# Supplementary material
Source: PubMed Central journal article supplement (PMC8051186)
Supplement: NIHMS1042791-supplement-Supp_FigS1.pdf [file NIHMS1042791-supplement-Supp_FigS1.pdf]

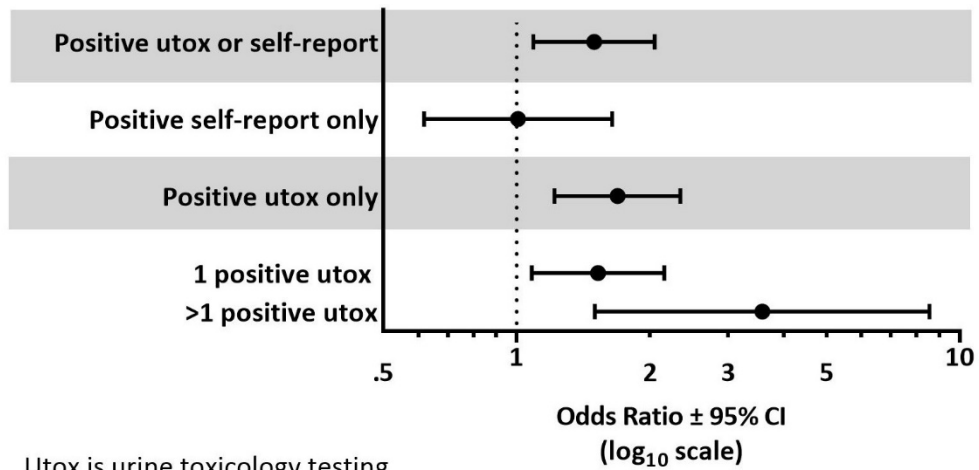

Utox is urine toxicology testing

\*Estimates adjusted for 4-category race/ethnicity and tobacco

**Figure S1.** Adjusted\* odds ratios for the effect of marijuana exposure on the primary composite adverse pregnancy outcome.
